# Supplementary material
Source: PubMed Central journal article supplement (PMC8138819)
Supplement: supplements_bbaa135.pdf [file supplements_bbaa135.pdf]

| Circadian Gene Symbol     |          |          |          |
|---------------------------|----------|----------|----------|
| Acacb                     | Fads2    | Tgfbr1   | Fkbp5    |
| Acadm                     | Fasn     | Alas1    | Usp2     |
| Acly                      | Fgf15    | Igfbp1   | Amd1     |
| Parp1                     | Insig1   | Raet1c   | Gck      |
| Cyp2d9                    | Insig2   | Rora     | Hmgcr    |
| Cyp7b1                    | Ldlr     | Sult1e1  | Lpin1    |
| Arntl                     | Lipg     | Fas      | Saa4     |
| Clock                     | Lpl      | Rxra     | Wee1     |
| Cry2                      | Nr0b2    | Cirbp    | Nampt    |
| Npas2                     | Nr1h2    | Fus      | Aco2     |
| Per1                      | Nr1h3    | Hsp90aa1 | Akr7a5   |
| Per2                      | Pctp     | Hsph1    | Aldh2    |
| Per3                      | Scap     | Cern4l   | Bhmt     |
| Acot1                     | Srebf1   | Cpt1a    | Cps1     |
| Acot2                     | Srebf2   | Pklr     | Eef1d    |
| Acot4                     | Apoc3    | Slc2a2   | Sord     |
| Cyp4a10                   | Avpr1a   | Slc37a4  | Bhlhe41  |
| Cyp4a14                   | Fkbp4    | Ucp2     | Nr1d1    |
| Ak3                       | Hspd1    | Aacs     | Nr1d2    |
| Rgs16                     | Tubb5    | Acot3    | Rorc     |
| Cend1                     | Dbp      | Apoa1    | G6pc     |
| Ddc                       | Hlf      | Cyp7a1   | Pek1     |
| Hist1h1c                  | Nfil3    | Elov13   | Ppara    |
| Rel1l                     | Tef      | Elov15   | Ppard    |
| Sbk1                      | Bhlhe40  | Elov16   | Pparg    |
| Smardc1                   | Por      | Fabp5    | Id2      |
| Non-circadian Gene Symbol |          |          |          |
| Eif2a                     | Zkscan14 | Trdmt1   | Zfx      |
| Utp6                      | Zfp1     | Tsfm     | Snx12    |
| Rpl19                     | Slc26a11 | Ercc612  | Zfp524   |
| Rplp0                     | Nkap     | Smg8     | Apbb3    |
| Tbp                       | Mobk12c  | Commd5   | Ppie     |
| Eef1a1                    | Eya3     | Ing5     | Cops7b   |
| Hmbs                      | Ddx27    | Fam119a  | Glmn     |
| Tbec                      | Asb6     | Fam175a  | Zfp592   |
| Actb                      | Zfp451   | Nvl      | Nub1     |
| Gapdh                     | Cln3     | Rexo1    | Zfp426   |
| Ppib                      | Gpn2     | Rngtt    | Sertad3  |
| Polr3f                    | Mtf1     | Snape3   | Zfp414   |
| Med6                      | Rab23    | Cdkal1   | Axin1    |
| Tyw1                      | Lysmd1   | Rrp9     | Casz1    |
| Vars2                     | Asb3     | Utp15    | Bcl2l1   |
| Eil                       | Zfp397   | Atpbd3   | Telo2    |
| Gtf2h3                    | Fam123b  | Nsun5    | Terf2ip  |
| Polr1a                    | Zkscan6  | Chd1     | Rabl4    |
| Ttf1                      | Adck2    | Kdm4a    | Dgcr8    |
| Mrps5                     | Usp36    | Men1     | Cep110   |
| Med23                     | Trib1    | Kdm5d    | Abcd4    |
| Polr3h                    | Tfpt     | Ankra2   | Rad50    |
| Pat1                      | Stam2    | Bcor     | Sesn2    |
| Med24                     | E2f3     | Rbm28    | Gnptab   |
| Tsr3                      | Zfp511   | Kat2a    | Gtf2ird2 |
| Rprd2                     | Slc10a7  | Gtpbp5   | Zscan12  |
| Tbc1d5                    | Vps33b   | Mynn     | Ino80b   |
| Ttc15                     | Ppm1f    | Sumf2    | Smurf1   |
| Mga                       |          |          |          |

**Supplementary Table 1. Circadian and non-circadian genes in *Mus musculus* liver as gold standard.** The 104 circadian gene list is extracted from Wu et al. (*J Biol Rhythms* 2014) and the 113 non-circadian gene list is obtained from Wu et al. (*PLoS One* 2012).

| Method           | Term                                                         | Count | Percent    | P-Value      | Benjamini    |
|------------------|--------------------------------------------------------------|-------|------------|--------------|--------------|
| GRO-seq MC       | mmu00260:Glycine, serine and threonine metabolism            | 3     | 11.5384615 | 1.408300e-03 | 4.812851e-02 |
| Nascent-seq RAIN | mmu04710:Circadian rhythm                                    | 4     | 4.4943820  | 4.546934e-04 | 4.359144e-02 |
| Nascent-seq eJTK | mmu04710:Circadian rhythm                                    | 5     | 5.8823529  | 1.448933e-05 | 1.259787e-03 |
| RNA-seq JTK      | mmu04710:Circadian rhythm                                    | 5     | 3.7037037  | 1.738213e-04 | 2.064430e-02 |
| RNA-seq RAIN     | mmu01100:Metabolic pathways                                  | 169   | 14.2978003 | 8.003523e-16 | 2.176037e-13 |
|                  | mmu00982:Drug metabolism – cytochrome P450                   | 25    | 2.1150592  | 1.644394e-11 | 2.302154e-09 |
|                  | mmu00980:Metabolism of xenobiotics by cytochrome P450        | 24    | 2.0304569  | 5.798815e-11 | 5.412229e-09 |
|                  | mmu00040:Penrose and glucuronate interconversions            | 16    | 1.3536379  | 2.901869e-09 | 2.031308e-07 |
|                  | mmu05204:Chemical carcinogenesis                             | 26    | 2.1996616  | 6.999948e-09 | 3.919970e-07 |
|                  | mmu00860:Porphyryn and chlorophyll metabolism                | 16    | 1.3536379  | 1.012513e-07 | 4.725049e-06 |
|                  | mmu00053:Ascorbate and aldarate metabolism                   | 12    | 1.0152284  | 1.519743e-06 | 6.078791e-05 |
|                  | mmu00983:Drug metabolism – other enzymes                     | 16    | 1.3536379  | 2.527470e-06 | 8.845766e-05 |
|                  | mmu04710:Circadian rhythm                                    | 11    | 0.9306261  | 5.067967e-05 | 1.575498e-03 |
|                  | mmu00830:Retinol metabolism                                  | 19    | 1.6074450  | 7.641930e-05 | 2.137534e-03 |
|                  | mmu01130:Biosynthesis of antibiotics                         | 31    | 2.6226734  | 5.198836e-04 | 1.314962e-02 |
|                  | mmu00480:Glutathione metabolism                              | 13    | 1.0998308  | 5.774587e-04 | 1.338751e-02 |
|                  | mmu04141:Protein processing in endoplasmic reticulum         | 26    | 2.1996616  | 6.167556e-04 | 1.320017e-02 |
|                  | mmu00130:Ubiquinone and other terpenoid–quinone biosynthesis | 6     | 0.5076142  | 7.081090e-04 | 1.406731e-02 |
|                  | mmu04146:Peroxisome                                          | 16    | 1.3536379  | 1.041198e-03 | 1.925798e-02 |
|                  | mmu00140:Steroid hormone biosynthesis                        | 16    | 1.3536379  | 1.708722e-03 | 2.948479e-02 |
|                  | mmu00270:Cysteine and methionine metabolism                  | 10    | 0.8460237  | 2.213890e-03 | 3.584623e-02 |
| RNA-seq eJTK     | mmu01100:Metabolic pathways                                  | 321   | 12.2753346 | 5.097538e-24 | 1.478286e-21 |
|                  | mmu00982:Drug metabolism – cytochrome P450                   | 35    | 1.3384321  | 7.422532e-12 | 1.076264e-09 |
|                  | mmu00980:Metabolism of xenobiotics by cytochrome P450        | 34    | 1.3001912  | 1.466155e-11 | 1.417289e-09 |
|                  | mmu01130:Biosynthesis of antibiotics                         | 70    | 2.6768642  | 3.479491e-10 | 2.522630e-08 |
|                  | mmu00280:Valine, leucine and isoleucine degradation          | 27    | 1.0325048  | 2.296309e-08 | 1.331858e-06 |
|                  | mmu05204:Chemical carcinogenesis                             | 37    | 1.4149140  | 2.547489e-08 | 1.231285e-06 |
|                  | mmu00071:Fatty acid degradation                              | 25    | 0.9560229  | 3.356184e-08 | 1.390418e-06 |
|                  | mmu01200:Carbon metabolism                                   | 40    | 1.5296367  | 7.604773e-07 | 2.756693e-05 |
|                  | mmu00053:Ascorbate and aldarate metabolism                   | 16    | 0.6118547  | 1.688110e-06 | 5.439322e-05 |
|                  | mmu04146:Peroxisome                                          | 31    | 1.1854685  | 2.657397e-06 | 7.706165e-05 |
|                  | mmu00040:Penrose and glucuronate interconversions            | 17    | 0.6500956  | 7.960225e-06 | 2.098393e-04 |
|                  | mmu00860:Porphyryn and chlorophyll metabolism                | 19    | 0.7265774  | 1.246414e-05 | 3.011731e-04 |
|                  | mmu00830:Retinol metabolism                                  | 31    | 1.1854685  | 1.338463e-05 | 2.985377e-04 |
|                  | mmu03050:Proteasome                                          | 20    | 0.7648184  | 1.425353e-05 | 2.952102e-04 |
|                  | mmu05012:Parkinson's disease                                 | 44    | 1.6826004  | 1.880681e-05 | 3.635357e-04 |
|                  | mmu04932:Non-alcoholic fatty liver disease (NAFLD)           | 45    | 1.7208413  | 3.346485e-05 | 6.063766e-04 |
|                  | mmu05010:Alzheimer's disease                                 | 49    | 1.8738050  | 3.797554e-05 | 6.476206e-04 |
|                  | mmu04710:Circadian rhythm                                    | 15    | 0.5736138  | 7.954074e-05 | 1.280720e-03 |
|                  | mmu01230:Biosynthesis of amino acids                         | 26    | 0.9942639  | 1.084256e-04 | 1.653637e-03 |
|                  | mmu04610:Complement and coagulation cascades                 | 26    | 0.9942639  | 1.084256e-04 | 1.653637e-03 |
|                  | mmu05230:Central carbon metabolism in cancer                 | 23    | 0.8795411  | 1.339332e-04 | 1.940277e-03 |
|                  | mmu00270:Cysteine and methionine metabolism                  | 17    | 0.6500956  | 1.469660e-04 | 2.027621e-03 |
|                  | mmu04919:Thyroid hormone signaling pathway                   | 34    | 1.3001912  | 1.606747e-04 | 2.115913e-03 |
|                  | mmu00190:Oxidative phosphorylation                           | 39    | 1.4913958  | 1.987891e-04 | 2.503581e-03 |
|                  | mmu01040:Biosynthesis of unsaturated fatty acids             | 13    | 0.4971319  | 3.111264e-04 | 3.752969e-03 |
|                  | mmu05016:Huntington's disease                                | 50    | 1.9120459  | 3.643095e-04 | 4.217841e-03 |
|                  | mmu00983:Drug metabolism – other enzymes                     | 19    | 0.7265774  | 3.704177e-04 | 4.123821e-03 |
|                  | mmu01212:Fatty acid metabolism                               | 19    | 0.7265774  | 3.704177e-04 | 4.123821e-03 |
|                  | mmu00130:Ubiquinone and other terpenoid–quinone biosynthesis | 8     | 0.3059273  | 3.795185e-04 | 4.068784e-03 |
|                  | mmu00062:Fatty acid elongation                               | 12    | 0.4588910  | 9.205811e-04 | 9.493629e-03 |
|                  | mmu00480:Glutathione metabolism                              | 19    | 0.7265774  | 1.038016e-03 | 1.033181e-02 |
|                  | mmu00140:Steroid hormone biosynthesis                        | 26    | 0.9942639  | 1.085668e-03 | 1.044556e-02 |
|                  | mmu04914:Progesterone–mediated oocyte maturation             | 26    | 0.9942639  | 1.085668e-03 | 1.044556e-02 |
|                  | mmu00380:Tryptophan metabolism                               | 17    | 0.6500956  | 1.212200e-03 | 1.128268e-02 |
|                  | mmu00650:Butanoate metabolism                                | 12    | 0.4588910  | 1.339581e-03 | 1.207460e-02 |
|                  | mmu04141:Protein processing in endoplasmic reticulum         | 42    | 1.6061185  | 1.425778e-03 | 1.246023e-02 |
|                  | mmu00010:Glycolysis / Gluconeogenesis                        | 21    | 0.8030593  | 1.643029e-03 | 1.392769e-02 |
|                  | mmu00260:Glycine, serine and threonine metabolism            | 15    | 0.5736138  | 1.788668e-03 | 1.472418e-02 |
|                  | mmu00410:beta–Alanine metabolism                             | 13    | 0.4971319  | 2.595500e-03 | 2.071815e-02 |
|                  | mmu00310:Lysine degradation                                  | 17    | 0.6500956  | 3.923485e-03 | 3.034227e-02 |
|                  | mmu04976:Bile secretion                                      | 21    | 0.8030593  | 4.242325e-03 | 3.192383e-02 |
|                  | mmu01210:2–Oxocarboxylic acid metabolism                     | 9     | 0.3441683  | 4.810340e-03 | 3.522031e-02 |
|                  | mmu00640:Propanoate metabolism                               | 11    | 0.4206501  | 5.011554e-03 | 3.576970e-02 |
|                  | mmu00340:Histidine metabolism                                | 10    | 0.3824092  | 5.039932e-03 | 3.510736e-02 |
|                  | mmu04915:Estrogen signaling pathway                          | 26    | 0.9942639  | 6.271672e-03 | 4.251073e-02 |
|                  | mmu00020:Citrate cycle (TCA cycle)                           | 12    | 0.4588910  | 6.343808e-03 | 4.201208e-02 |
|                  | mmu02010:ABC transporters                                    | 15    | 0.5736138  | 7.532058e-03 | 4.860982e-02 |
| RNA-seq MC       | mmu04710:Circadian rhythm                                    | 5     | 5.3191489  | 6.382092e-05 | 6.235130e-03 |
| RNA-seq BC       | mmu04710:Circadian rhythm                                    | 9     | 2.2842640  | 6.040930e-07 | 1.413478e-04 |
|                  | mmu01100:Metabolic pathways                                  | 52    | 13.1979695 | 2.048620e-04 | 2.368628e-02 |

| Category                                | Term                                                 | Count                           | Percent    | P-Value      | Benjamini    |              |
|-----------------------------------------|------------------------------------------------------|---------------------------------|------------|--------------|--------------|--------------|
| XR-seq RAIN                             | mmu01100:Metabolic pathways                          | 230                             | 10.1769912 | 5.399408e-09 | 1.538830e-06 |              |
|                                         | mmu04146:Peroxisome                                  | 29                              | 1.2831858  | 7.423091e-07 | 1.057735e-04 |              |
|                                         | mmu04710:Circadian rhythm                            | 15                              | 0.6637168  | 1.013260e-05 | 9.621386e-04 |              |
|                                         | mmu04141:Protein processing in endoplasmic reticulum | 43                              | 1.9026549  | 1.257843e-05 | 8.958171e-04 |              |
|                                         | mmu03040:Spliceosome                                 | 36                              | 1.5929204  | 2.050925e-05 | 1.168356e-03 |              |
|                                         | mmu03050:Proteasome                                  | 18                              | 0.7964602  | 2.103473e-05 | 9.986614e-04 |              |
|                                         | mmu04152:AMPK signaling pathway                      | 35                              | 1.5486726  | 2.170888e-05 | 8.834807e-04 |              |
|                                         | mmu05169:Epstein-Barr virus infection                | 35                              | 1.5486726  | 8.306604e-05 | 2.954976e-03 |              |
|                                         | mmu03013:RNA transport                               | 41                              | 1.8141593  | 8.816172e-05 | 2.788017e-03 |              |
|                                         | mmu00270:Cysteine and methionine metabolism          | 15                              | 0.6637168  | 2.880869e-04 | 8.178035e-03 |              |
|                                         | mmu03010:Ribosome                                    | 35                              | 1.5486726  | 3.128193e-04 | 8.073366e-03 |              |
|                                         | mmu04068:FoxO signaling pathway                      | 33                              | 1.4601770  | 3.284607e-04 | 7.771865e-03 |              |
|                                         | mmu04932:Non-alcoholic fatty liver disease (NAFLD)   | 37                              | 1.6371681  | 3.354265e-04 | 7.327834e-03 |              |
|                                         | mmu01130:Biosynthesis of antibiotics                 | 46                              | 2.0353982  | 5.152173e-04 | 1.043622e-02 |              |
|                                         | mmu04920:Adipocytokine signaling pathway             | 21                              | 0.9292035  | 5.603045e-04 | 1.059227e-02 |              |
|                                         | mmu04120:Ubiquitin mediated proteolysis              | 32                              | 1.4159292  | 1.972447e-03 | 3.455766e-02 |              |
|                                         | XR-seq eJTK                                          | mmu01100:Metabolic pathways     | 153        | 10.1526211   | 2.637646e-06 | 7.356334e-04 |
|                                         |                                                      | mmu04710:Circadian rhythm       | 12         | 0.7962840    | 2.807031e-05 | 3.908206e-03 |
|                                         |                                                      | mmu04152:AMPK signaling pathway | 25         | 1.6589250    | 1.780315e-04 | 1.642207e-02 |
|                                         |                                                      | mmu03040:Spliceosome            | 25         | 1.6589250    | 3.253113e-04 | 2.243858e-02 |
| mmu03013:RNA transport                  |                                                      | 29                              | 1.9243530  | 5.151755e-04 | 2.834473e-02 |              |
| mmu04120:Ubiquitin mediated proteolysis |                                                      | 25                              | 1.6589250  | 8.709083e-04 | 3.970512e-02 |              |
| mmu04068:FoxO signaling pathway         |                                                      | 24                              | 1.5925680  | 8.906319e-04 | 3.489064e-02 |              |
| mmu03050:Proteasome                     |                                                      | 12                              | 0.7962840  | 1.113533e-03 | 3.811088e-02 |              |
| mmu01130:Biosynthesis of antibiotics    |                                                      | 33                              | 2.1897810  | 1.190583e-03 | 3.625647e-02 |              |
| mmu01100:Metabolic pathways             |                                                      | 200                             | 10.1781170 | 5.203804e-08 | 1.488277e-05 |              |
| XR-seq BC                               | mmu03013:RNA transport                               | 42                              | 2.1374046  | 1.096642e-06 | 1.568075e-04 |              |
|                                         | mmu03050:Proteasome                                  | 17                              | 0.8651399  | 1.435104e-05 | 1.367207e-03 |              |
|                                         | mmu04152:AMPK signaling pathway                      | 32                              | 1.6284987  | 2.042087e-05 | 1.459042e-03 |              |
|                                         | mmu01212:Fatty acid metabolism                       | 18                              | 0.9160305  | 2.073602e-05 | 1.185410e-03 |              |
|                                         | mmu04146:Peroxisome                                  | 24                              | 1.2213740  | 2.445182e-05 | 1.164872e-03 |              |
|                                         | mmu04141:Protein processing in endoplasmic reticulum | 38                              | 1.9338422  | 3.290665e-05 | 1.343590e-03 |              |
|                                         | mmu01130:Biosynthesis of antibiotics                 | 45                              | 2.2900763  | 3.714389e-05 | 1.327037e-03 |              |
|                                         | mmu04710:Circadian rhythm                            | 13                              | 0.6615776  | 6.531774e-05 | 2.073567e-03 |              |
|                                         | mmu04920:Adipocytokine signaling pathway             | 20                              | 1.0178117  | 2.475823e-04 | 7.056713e-03 |              |
|                                         | mmu03040:Spliceosome                                 | 29                              | 1.4758270  | 6.326819e-04 | 1.632029e-02 |              |
|                                         | mmu00071:Fatty acid degradation                      | 15                              | 0.7633588  | 6.711375e-04 | 1.587348e-02 |              |
|                                         | mmu03015:mRNA surveillance pathway                   | 23                              | 1.1704835  | 7.180379e-04 | 1.567830e-02 |              |
|                                         | mmu04530:Tight junction                              | 22                              | 1.1195929  | 7.323059e-04 | 1.485402e-02 |              |
|                                         | mmu04932:Non-alcoholic fatty liver disease (NAFLD)   | 32                              | 1.6284987  | 1.041217e-03 | 1.966692e-02 |              |
|                                         | mmu04140:Regulation of autophagy                     | 10                              | 0.5089059  | 1.391158e-03 | 2.457719e-02 |              |
|                                         | mmu04120:Ubiquitin mediated proteolysis              | 29                              | 1.4758270  | 1.823600e-03 | 3.024072e-02 |              |
|                                         | mmu05100:Bacterial invasion of epithelial cells      | 19                              | 0.9669211  | 1.954260e-03 | 3.060334e-02 |              |
|                                         | mmu04068:FoxO signaling pathway                      | 27                              | 1.3740458  | 3.291902e-03 | 4.842192e-02 |              |

**Supplementary Table 2. Pathway enrichment analysis of significantly cyclic genes from the light-dark datasets.** Functional annotations (KEGG pathway mapping) of the significant genes (q-values  $\leq 0.05$ ) are carried out using the the DAVID Bioinformatics Resources (<https://david.ncifcrf.gov/>). The list only contains significantly enriched pathways with a 0.05 cutoff of the p-values adjusted by Benjamini Hochberg.

| Method                                                       | Term                                                 | Count     | Percent      | P-Value      | Benjamini    |
|--------------------------------------------------------------|------------------------------------------------------|-----------|--------------|--------------|--------------|
| JTK                                                          | mmu04610:Complement and coagulation cascades         | 8         | 7.4074074    | 6.721172e-06 | 7.256256e-04 |
|                                                              | mmu01100:Metabolic pathways                          | 25        | 23.1481481   | 4.274151e-04 | 2.282092e-02 |
| RAIN                                                         | mmu01100:Metabolic pathways                          | 173       | 32.6415094   | 1.199819e-40 | 2.567613e-38 |
|                                                              | mmu01130:Biosynthesis of antibiotics                 | 56        | 10.5660377   | 3.862699e-25 | 4.133088e-23 |
|                                                              | mmu01200:Carbon metabolism                           | 36        | 6.7924528    | 9.865999e-19 | 7.037746e-17 |
|                                                              | mmu00071:Fatty acid degradation                      | 24        | 4.5283019    | 1.203313e-17 | 6.437722e-16 |
|                                                              | mmu01212:Fatty acid metabolism                       | 21        | 3.9622642    | 1.230112e-13 | 5.264900e-12 |
|                                                              | mmu00620:Pyruvate metabolism                         | 18        | 3.3962264    | 1.108719e-12 | 3.954248e-11 |
|                                                              | mmu00280:Valine, leucine and isoleucine degradation  | 19        | 3.5849057    | 7.498068e-11 | 2.292267e-09 |
|                                                              | mmu00020:Citrate cycle (TCA cycle)                   | 15        | 2.8301887    | 1.088804e-10 | 2.912552e-09 |
|                                                              | mmu04141:Protein processing in endoplasmic reticulum | 31        | 5.8490566    | 8.613214e-10 | 2.048031e-08 |
|                                                              | mmu00190:Oxidative phosphorylation                   | 28        | 5.2830189    | 8.951829e-10 | 1.915691e-08 |
|                                                              | mmu00830:Retinol metabolism                          | 22        | 4.1509434    | 1.760418e-09 | 3.424813e-08 |
|                                                              | mmu00640:Propanoate metabolism                       | 13        | 2.4528302    | 1.948424e-09 | 3.474690e-08 |
|                                                              | mmu04146:Peroxisome                                  | 21        | 3.9622642    | 2.917345e-09 | 4.802398e-08 |
|                                                              | mmu01230:Biosynthesis of amino acids                 | 20        | 3.7735849    | 3.764751e-09 | 5.754691e-08 |
|                                                              | mmu03320:PPAR signaling pathway                      | 20        | 3.7735849    | 9.469415e-09 | 1.350970e-07 |
|                                                              | mmu05012:Parkinson's disease                         | 26        | 4.9056604    | 8.303846e-08 | 1.110639e-06 |
|                                                              | mmu00380:Tryptophan metabolism                       | 14        | 2.6415094    | 3.196986e-07 | 4.024434e-06 |
|                                                              | mmu00630:Glyoxylate and dicarboxylate metabolism     | 11        | 2.0754717    | 7.851021e-07 | 9.333951e-06 |
|                                                              | mmu00140:Steroid hormone biosynthesis                | 18        | 3.3962264    | 1.153208e-06 | 1.298869e-05 |
|                                                              | mmu05010:Alzheimer's disease                         | 26        | 4.9056604    | 2.373644e-06 | 2.539770e-05 |
|                                                              | mmu00062:Fatty acid elongation                       | 10        | 1.8867925    | 2.743240e-06 | 2.795457e-05 |
|                                                              | mmu00010:Glycolysis / Gluconeogenesis                | 15        | 2.8301887    | 3.714133e-06 | 3.612780e-05 |
|                                                              | mmu05016:Huntington's disease                        | 27        | 5.0943396    | 5.915296e-06 | 5.503662e-05 |
|                                                              | mmu05204:Chemical carcinogenesis                     | 17        | 3.2075472    | 1.158093e-05 | 1.032586e-04 |
|                                                              | mmu01210:2-Oxocarboxylic acid metabolism             | 8         | 1.5094340    | 2.302407e-05 | 1.970689e-04 |
|                                                              | mmu01040:Biosynthesis of unsaturated fatty acids     | 9         | 1.6981132    | 3.645856e-05 | 3.000424e-04 |
|                                                              | mmu00650:Butanoate metabolism                        | 9         | 1.6981132    | 3.645856e-05 | 3.000424e-04 |
|                                                              | mmu04932:Non-alcoholic fatty liver disease (NAFLD)   | 21        | 3.9622642    | 1.093741e-04 | 8.665630e-04 |
|                                                              | mmu00220:Arginine biosynthesis                       | 7         | 1.3207547    | 2.420391e-04 | 1.848384e-03 |
|                                                              | mmu03050:Proteasome                                  | 10        | 1.8867925    | 3.320438e-04 | 2.447661e-03 |
|                                                              | mmu00982:Drug metabolism – cytochrome P450           | 12        | 2.2641509    | 3.996930e-04 | 2.847651e-03 |
|                                                              | mmu00270:Cysteine and methionine metabolism          | 9         | 1.6981132    | 7.105099e-04 | 4.894536e-03 |
|                                                              | mmu00310:Lysine degradation                          | 10        | 1.8867925    | 1.009361e-03 | 6.730756e-03 |
| mmu00410:beta-Alanine metabolism                             | 8                                                    | 1.5094340 | 1.058989e-03 | 6.847468e-03 |              |
| mmu00980:Metabolism of xenobiotics by cytochrome P450        | 11                                                   | 2.0754717 | 1.224984e-03 | 7.685233e-03 |              |
| mmu00072:Synthesis and degradation of ketone bodies          | 5                                                    | 0.9433962 | 1.570289e-03 | 9.562728e-03 |              |
| mmu00053:Ascorbate and aldarate metabolism                   | 7                                                    | 1.3207547 | 1.875310e-03 | 1.109612e-02 |              |
| mmu00330:Arginine and proline metabolism                     | 9                                                    | 1.6981132 | 2.805579e-03 | 1.611835e-02 |              |
| mmu00591:Linoleic acid metabolism                            | 9                                                    | 1.6981132 | 3.196868e-03 | 1.787065e-02 |              |
| mmu00260:Glycine, serine and threonine metabolism            | 8                                                    | 1.5094340 | 3.412465e-03 | 1.858201e-02 |              |
| mmu04964:Proximal tubule bicarbonate reclamation             | 6                                                    | 1.1320755 | 4.066064e-03 | 2.156193e-02 |              |
| mmu00061:Fatty acid biosynthesis                             | 5                                                    | 0.9433962 | 4.223097e-03 | 2.184700e-02 |              |
| mmu00360:Phenylalanine metabolism                            | 6                                                    | 1.1320755 | 4.984794e-03 | 2.514080e-02 |              |
| mmu00400:Phenylalanine, tyrosine and tryptophan biosynthesis | 4                                                    | 0.7547170 | 5.857129e-03 | 2.881192e-02 |              |
| mmu00120:Primary bile acid biosynthesis                      | 5                                                    | 0.9433962 | 7.088942e-03 | 3.400906e-02 |              |
| mmu04612:Antigen processing and presentation                 | 11                                                   | 2.0754717 | 7.757074e-03 | 3.635568e-02 |              |
| mmu04142:Lysosome                                            | 14                                                   | 2.6415094 | 8.139112e-03 | 3.730583e-02 |              |
| mmu00250:Alanine, aspartate and glutamate metabolism         | 7                                                    | 1.3207547 | 9.639924e-03 | 4.314685e-02 |              |
| mmu04975:Fat digestion and absorption                        | 7                                                    | 1.3207547 | 1.097517e-02 | 4.801067e-02 |              |
| MC                                                           | mmu04610:Complement and coagulation cascades         | 9         | 6.8702290    | 1.950814e-06 | 2.360209e-04 |
|                                                              | mmu01100:Metabolic pathways                          | 31        | 23.6641221   | 3.112798e-05 | 1.881500e-03 |
|                                                              | mmu00140:Steroid hormone biosynthesis                | 7         | 5.3435115    | 4.272723e-04 | 1.708929e-02 |

**Supplementary Table 3. Pathway enrichment analysis of significantly cyclic proteins.** Functional annotations (KEGG pathway mapping) of the significant proteins ( $q$ -values  $\leq 0.05$ ) are carried out using the the DAVID Bioinformatics Resources (<https://david.ncifcrf.gov/>). The list only contains significantly enriched pathways with a 0.05 cutoff of the  $p$ -values adjusted by Benjamini Hochberg. KEGG metabolic pathways were enriched by all three methods.

| Types                        | Waveforms    | Equations                                                                                                                                                                                                                     | Examples                                                                              |
|------------------------------|--------------|-------------------------------------------------------------------------------------------------------------------------------------------------------------------------------------------------------------------------------|---------------------------------------------------------------------------------------|
|                              |              | amp = A pha = $\phi$ per = T                                                                                                                                                                                                  |                                                                                       |
| Stationary<br>(Periodic)     | cosine       | $A \cos\left(\frac{2\pi(t - \phi)}{T}\right)$                                                                                                                                                                                 |    |
|                              | cosine 2     | $\frac{A}{1.39} \cos\left(\frac{2\pi(t - \phi_1)}{T}\right) + 0.5 \cos\left(\frac{2\pi(t - \phi_2)}{T_2}\right)$<br>where $T_2 = \frac{1}{3}T$ , $\phi_1 = \phi + \frac{0.215T}{\pi}$ , $\phi_2 = (\phi_1 + 0.25T_2) \bmod T$ |    |
|                              | cosine peak  | $A \left(-1 + 2 \left  \cos\left(\frac{\pi(t - \phi)}{T}\right) \right ^{10}\right)$                                                                                                                                          |    |
| Non-stationary<br>(Periodic) | cosine damp  | $A \cos\left(\frac{2\pi(t - \phi)}{T}\right) e^{-0.01t}$                                                                                                                                                                      |    |
|                              | trend exp    | $5e^{-0.01t} + A \cos\left(\frac{2\pi(t - \phi)}{T}\right) e^{-0.01t}$                                                                                                                                                        |    |
|                              | trend linear | $A \cos\left(\frac{2\pi(t - \phi)}{T}\right) + st$<br>where $s \sim U(-0.05, 0)$                                                                                                                                              |   |
| Asymmetric<br>(Periodic)     | saw-tooth    | $\frac{-2A}{\pi} \arctan\left(\frac{1}{\tan\left(\frac{\pi(t-\phi)}{T}\right)}\right)$                                                                                                                                        |  |
| Non-periodic                 | linear       | $st$<br>where $s \sim U(-0.05, 0)$                                                                                                                                                                                            |  |
|                              | flat         | 0                                                                                                                                                                                                                             |  |

**Supplementary Table 4. In silico generated periodic v.s. non-periodic gene profiles.** Three types of periodic waveforms are included: stationary, non-stationary, and asymmetric. The stationary and non-stationary subgroups consist of three forms of cosine curves. The asymmetric subgroup consists of a saw-tooth waveform. Flat or linear lines are adopted to generate non-periodic waveforms. The waveforms shown are constructed without noise. ‘Amp’, ‘pha’, and ‘per’ represent amplitude, phase and period, respectively.

| Simulation group | Description                                                       | Period length | Amplitude                  | Phase shift                 | Waveforms                                                                                                                                                               | Noise levels | Sampling patterns & replicates                                                                     | Sample size (profiles) |
|------------------|-------------------------------------------------------------------|---------------|----------------------------|-----------------------------|-------------------------------------------------------------------------------------------------------------------------------------------------------------------------|--------------|----------------------------------------------------------------------------------------------------|------------------------|
| Group 1          | The trade-off between time window and sampling frequency          | 24            | Uniform Distribution (1-6) | Uniform Distribution (0-24) | Periodic: cosine, cosine 2, cosine peak<br>Non-periodic: flat                                                                                                           | N(0, 1)      | 4 h/1 day X 1 & 8 h/2 days X 1<br>3 h/1 day X 1 & 6 h/2 days X 1<br>2 h/1 day X 1 & 4 h/2 days X 1 | 12,000                 |
| Group 2          | The trade-off between time window and replicates                  | 24            | Uniform Distribution (1-6) | Uniform Distribution (0-24) | Periodic: cosine, cosine 2, cosine peak<br>Non-periodic: flat                                                                                                           | N(0, 1)      | 4 h/1 day X 1 & 8 h/1 day X 2<br>3 h/1 day X 1 & 6 h/1 day X 2<br>2 h/1 day X 1 & 4 h/1 day X 2    | 12,000                 |
| Group 3          | stationary, non-stationary and asymmetric curves                  | 24            | Uniform Distribution (1-6) | Uniform Distribution (0-24) | Periodic:<br>Stationary (cosine, cosine 2, cosine peak)<br>Nonstationary (cosine damp, trend exp, trend linear)<br>Asymmetric (Saw-tooth)<br>Non-periodic: flat, linear | N(0, 1)      | 4 h/ 1 day X 1<br>3 h/ 1 day X 1<br>2 h/ 1 day X 1                                                 | 12,000                 |
| Group 4          | Signal to Noise Ratio (SNR) 0.5:1, 1:1, 2:1, 3:1                  | 24            | sqrt(2*SNR)                | Uniform Distribution (0-24) | Periodic: cosine<br>Non-periodic: flat                                                                                                                                  | N(0, 1)      | 4 h/ 1 day X 1<br>3 h/ 1 day X 1<br>2 h/ 1 day X 1                                                 | 12,000                 |
| Group 5          | Uneven sampling (1, 2, or 4 randomly selected timepoints removed) | 24            | Uniform Distribution (1-6) | Uniform Distribution (0-24) | Periodic: cosine, cosine 2, cosine peak<br>Non-periodic: flat                                                                                                           | N(0, 1)      | 4 h/ 1 day X 1<br>3 h/ 1 day X 1<br>2 h/ 1 day X 1                                                 | 12,000                 |
| Group 6          | Missing value (1%, 5%, 10% genes missing)                         | 24            | Uniform Distribution (1-6) | Uniform Distribution (0-24) | Periodic: cosine, cosine 2, cosine peak<br>Non-periodic: flat                                                                                                           | N(0, 1)      | 4 h/ 1 day X 1<br>3 h/ 1 day X 1<br>2 h/ 1 day X 1                                                 | 12,000                 |

**Supplementary Table 5. Details of simulation setup and parameters used to in silico generate periodic and non-periodic profiles.** Each simulation run consists of 6,000 periodic and 6,000 non-periodic gene profiles. All simulated waveforms have a period length of 24, a phase shift that is uniformly distributed between 0 and 24, and a noise term with standard normal distribution. The amplitude is uniformly distributed between 1 and 6 for all groups except when testing for different signal-to-noise ratios (SNRs), which we define as the ratios of the empirical variances of the cosine function and the variances of the noise. Non-periodic profiles are sampled from a flat/linear function. “X 1” indicates no replicate and “X 2” indicates two replicates.

| Methods | 1 h/2 days | 2 h/2 days | 4 h/2 days |
|---------|------------|------------|------------|
| LS      | 13s        | 11s        | 11s        |
| ARS     | 18s        | 13s        | 21s        |
| JTK     | 30s        | 5s         | 2s         |
| RAIN    | 729s       | 26s        | 4s         |
| eJTK    | 98s        | 49s        | 29s        |
| MC      | 61s        | 29s        | 34s        |
| BC      | 16s        | 8s         | 7s         |

**Supplementary Table 6. Evaluation of computational efficiency with different sampling rates.** Each method is run on a dataset with a total of 6,000 genes. All programs are run on a Macbook Pro (15-inch, 2019) with 2.3 GHz 8-Core Intel Core i9 and 16 GB memory. Running time for MetaCycle is the sum of the running time for LS, ARSER, and JTK\_CYCLE. Running time for BIO\_CYCLE does not include the time used to fit the deep neural network.

| Method      | 5K     | 10K    | 50K    | 100K   | 500K   |
|-------------|--------|--------|--------|--------|--------|
| <b>LS</b>   | 0.5667 | 0.5599 | 0.6785 | 0.7467 | 0.8188 |
| <b>JTK</b>  | 0.6329 | 0.6141 | 0.6958 | 0.7604 | 0.7934 |
| <b>RAIN</b> | 0.6220 | 0.6781 | 0.8243 | 0.8501 | 0.8666 |
| <b>eJTK</b> | 0.6388 | 0.6008 | 0.6880 | 0.7775 | 0.8410 |
| <b>MC</b>   | 0.6068 | 0.5982 | 0.7045 | 0.7514 | 0.8085 |
| <b>BC</b>   | 0.4578 | 0.4947 | 0.6525 | 0.7463 | 0.7998 |

**Supplementary Table 7. Performance assessment of downsampled RNA-seq data.** AUC values of downsampled RNA-seq datasets with varying sequencing depths were calculated. Existing methods suffer from low sequencing depths. The performance of RAIN exceeds that of all other methods in all sequencing depths with an exception at 5K, due to its large number of significant genes detected in general. BIO\_CYCLE consistently ranks the lowest at all but the highest sequencing depth. The performances of LS, JTK\_CYCLE, eJTK\_CYCLE, and MetaCycle are comparable.



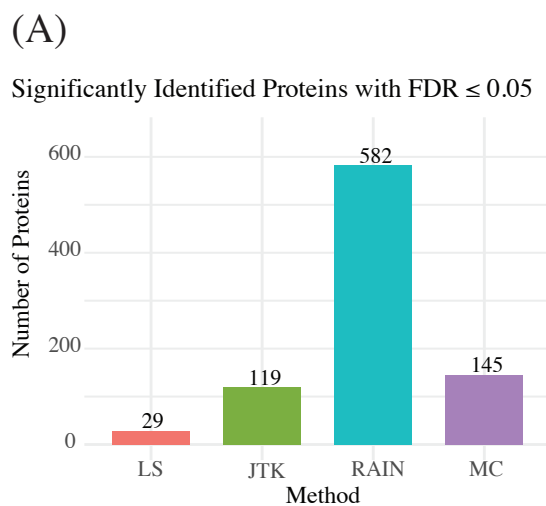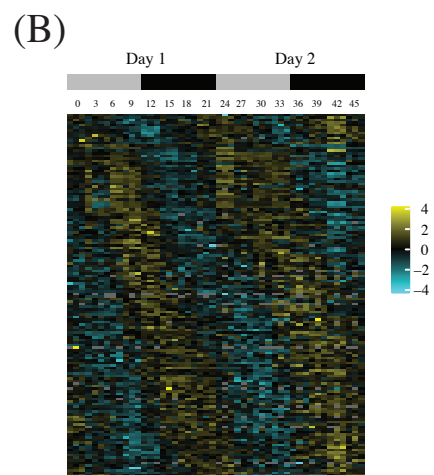

**Supplementary Figure 1. Circadian rhythm detection of *Mus musculus* liver proteomic dataset.** (A) Bar plot of the number of significant proteins detected by each method using an FDR threshold of 0.05. Only methods that are able to handle both replicates and missing values were applied and evaluated. (B) Heatmap of scaled measurements of oscillatory proteins identified by at least two methods. Proteins (rows) are ordered based on their inferred phases.

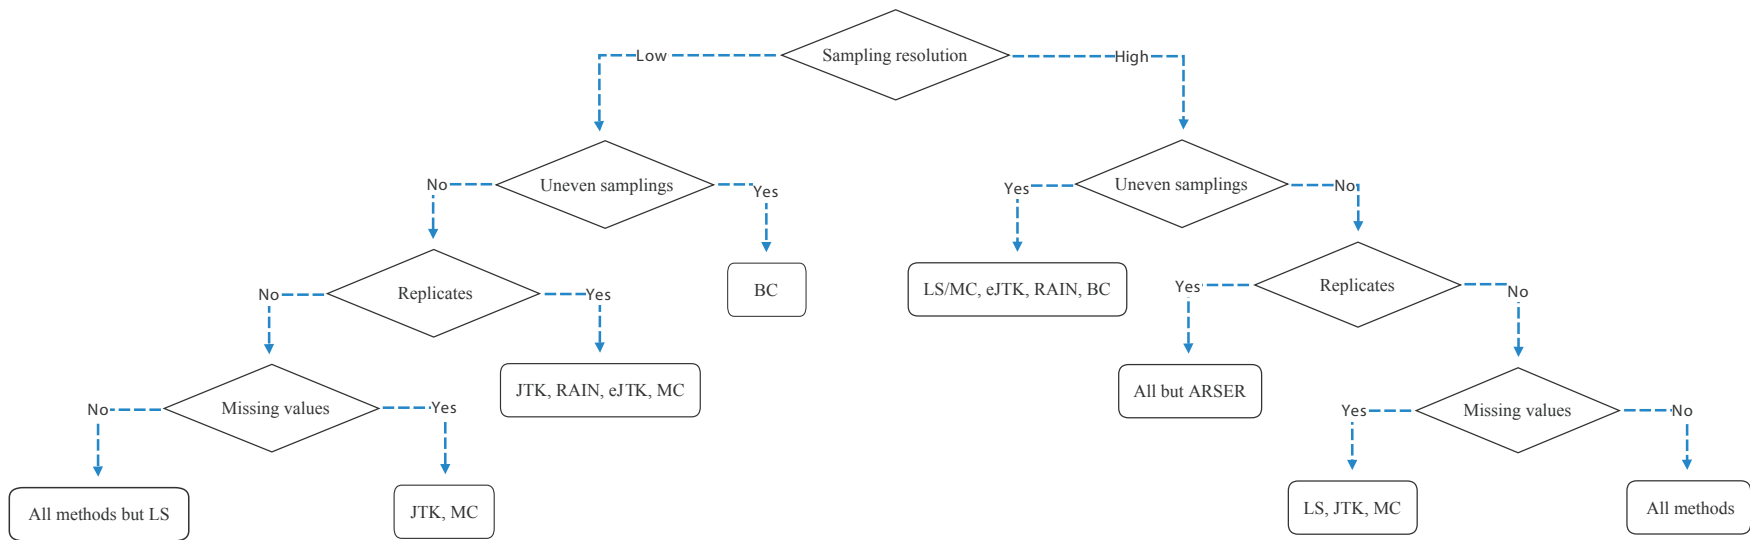

**Supplementary Figure 2. Decision tree as user guidance on method selection.** The decision tree has decision rules for sampling resolutions, uneven samplings, replicates, and missing values.
